# Supplementary material for: Exploring experimental cerebral malaria pathogenesis through the characterisation of host-derived plasma microparticle protein content
Source: PubMed Central journal article supplement (PMC5137300; doi:10.1038/srep37871), 2016-12-05
Supplement: srep37871-s1.pdf [file srep37871-s1.pdf]

**SUPPLEMENTARY INFORMATION: Exploring experimental cerebral malaria pathogenesis through the characterisation of host-derived plasma microparticle protein content**

*Natalia Tiberti<sup>1,2a</sup>, Sharissa L. Latham<sup>1</sup>, Stephen Bush<sup>3</sup>, Amy Cohen<sup>1</sup>, Robert O. Opoka<sup>4</sup>, Chandy C. John<sup>5,6</sup>, Annette Juillard<sup>1</sup>, Georges E. Grau<sup>1,7</sup>, Valéry Combes<sup>1, 2a, 7\*</sup>*

## **Supplementary information**

### **Detailed description of the mass spectrometry analyses**

MS analyses were performed on a QExactive Orbitrap Plus (Thermo Electron) equipped with an Ultimate 3000 HPLC and autosampler system (Dionex). Peptide samples were concentrated and desalted onto a micro C18 pre-column (300 $\mu$ m x 5mm, Dionex) with H<sub>2</sub>O:CH<sub>3</sub>CN (98:2, 0.1% TFA) at 15  $\mu$ L/min. After 4 min wash, the pre-column was switched (Valco 10 port valve, Dionex) into line with a fritless nano column (75  $\mu$ m x 15 cm) containing C18 media (1.9  $\mu$ m, 120 Å, Dr Maisch) manufactured according to Gatlin et al. (35). High voltage (2000 V) was applied to a low volume Titanium union (Valco) with the column oven heated to 45°C (Sonation) and the tip positioned ~0.5 cm from the heated capillary (T=300°C) of the mass spectrometer. For the TMT6 sample, the analytical peptide separation was run at a flow rate of 200 nL/min for 260 min using a gradient of H<sub>2</sub>O/FA 0.1% (solvent A) and CH<sub>3</sub>CN/FA 0.1% (solvent B) as follows: 0-4 min 2%B, then to 45%B at 246 min and to 80%B at 248 min, and finally 2%B till 260 min. For the TMT0 samples, a gradient of 140 min was applied as follows: 0-4 min 2%B, then to 45%B at 126 min and to 80%B at 127 min, and finally 2%B till 140min, at a flow rate of 200 nL/min.

The QExactive mass spectrometer was operated in the data dependent mode as previously reported (36). A survey scan m/z spectra 350-1750 was acquired in the Orbitrap with 70,000 resolution at m/z 200, and accumulation target value of 1x10<sup>6</sup> ions and lockmass enabled (m/z 445.12003). Up to the 10 most abundant ions (>80,000 counts, underfill ratio 10%) with charge state  $\geq +2$  and  $<+7$  were sequentially isolated (width m/z 2.5) and fragmented in the HCD collision cell (NCE = 30) with a maximum injection time of 100ms, 17,500 resolution at m/z 200 and target value set at 1x10<sup>5</sup>. The lower mass of the scanned range was set at m/z 100 to include TMT reporters.

All mass spectrometry analyses were carried out at the Bioanalytical Mass Spectrometry Facility, University of New South Wales, Australia.

Supplementary information

**Figure S1. Demographic characteristics of the mice used in the present study. A)** Demography of the DBA/1 mice used for the proteomics experiments, both qualitative (TMT<sup>0</sup>-NI and TMT<sup>0</sup>-ECM) and quantitative (TMT<sup>6</sup>-1 and TMT<sup>6</sup>-2); **B)** Demography and survival curve of DBA/1 and C57BL/6 mice used for the verification of S100A8 and CA-I in MP by western blot.

| Proteomics experiments       | DBA/1        |              |               |
|------------------------------|--------------|--------------|---------------|
|                              | NI (n=5)     | d3 pi (n=5)  | ECM (n=5)     |
| Age, weeks (Mean ± SD)       | 14.5 ± 3.9   | 12.5 ± 4.2   | 13.8 ± 4.7    |
| Gender, M (n)                | 5            | 3            | 4             |
| Parasitaemia, % (Mean ± SD)* | na           | <1           | 13.9 ± 4.9    |
| MP/μL (Mean ± SEM)           | 290.9 ± 94.3 | 347.5 ± 80.6 | 726.3 ± 313.1 |

\* % parasitaemia measured at the time of blood sampling  
ECM samples were obtained at day8 after infection

**A**

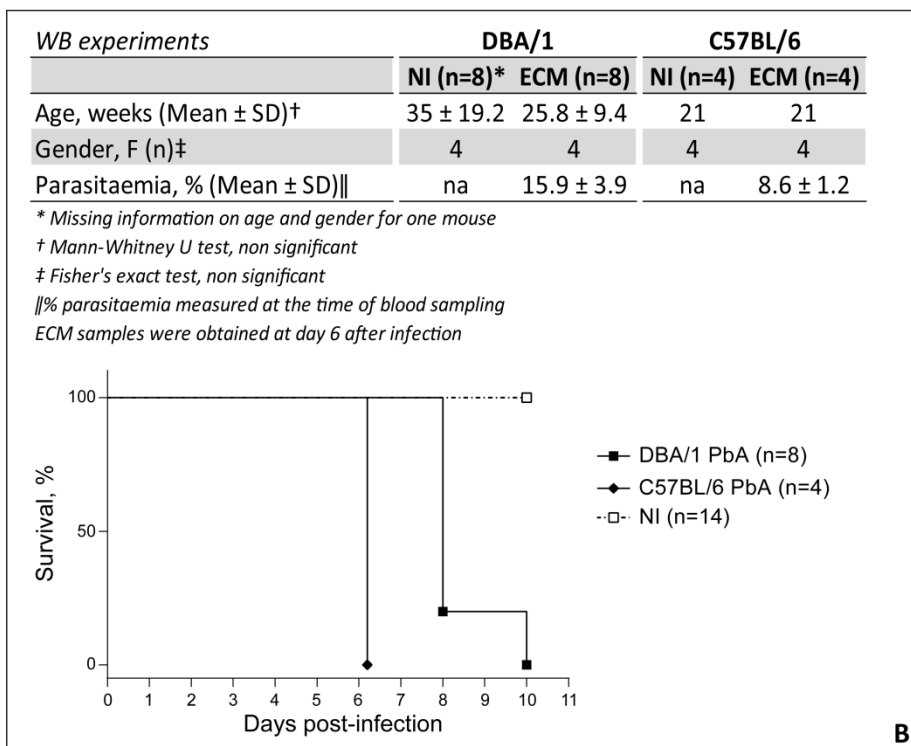

Supplementary information

**Table S1. NI associated proteins.** List of proteins (n=43) significantly over-expressed in NI compared either to d3 pi or to ECM (TMT<sup>6</sup> experiments) and proteins only identified in the NI sample (TMT<sup>0</sup> experiment)

| #  | AC     | ID          | Description                                                                | ECM/NI Ratio        |                     | d3pi/NI Ratio       |                     |
|----|--------|-------------|----------------------------------------------------------------------------|---------------------|---------------------|---------------------|---------------------|
|    |        |             |                                                                            | TMT <sup>6</sup> #1 | TMT <sup>6</sup> #2 | TMT <sup>6</sup> #1 | TMT <sup>6</sup> #2 |
| 1  | Q9Z126 | PLF4_MOUSE  | Platelet factor 4 (PF-4)                                                   | --                  | 0.24                | --                  | 0.28                |
| 2  | P33622 | APOC3_MOUSE | Apolipoprotein C-III (Apo-CIII) (ApoC-III)                                 | --                  | 0.40                | --                  | --                  |
| 3  | Q62351 | TFR1_MOUSE  | Transferrin receptor protein 1 (TR) (TfR) (TfR1) (Trfr)                    | --                  | 0.40                | --                  | --                  |
| 4  | P34928 | APOC1_MOUSE | Truncated apolipoprotein C-I (Apo-CIB') (ApoC-IB')                         | --                  | 0.41                | --                  | 0.50                |
| 5  | P23953 | EST1C_MOUSE | Carboxylesterase 1C                                                        | 0.43                | --                  | --                  | --                  |
| 6  | Q8CIZ8 | VWF_MOUSE   | von Willebrand antigen 2                                                   | --                  | 0.45                | --                  | 0.34                |
| 7  | P09813 | APOA2_MOUSE | Proapolipoprotein A-II (ProapoA-II)                                        | --                  | 0.47                | --                  | --                  |
| 8  | P01898 | HA10_MOUSE  | H-2 class I histocompatibility antigen, Q10 alpha chain                    | 0.49                |                     | --                  | --                  |
| 9  | Q05020 | APOC2_MOUSE | Apolipoprotein C-II (Apo-CII) (ApoC-II)                                    | 0.52                | --                  | --                  | --                  |
| 10 | Q8K0E8 | FIBB_MOUSE  | Fibrinogen beta chain [CHAIN 0]                                            | --                  | 0.54                | --                  | 0.50                |
| 11 | P06728 | APOA4_MOUSE | Apolipoprotein A-IV (Apo-AIV) (ApoA-IV)                                    | 0.54                | --                  | --                  | --                  |
| 12 | P07759 | SPA3K_MOUSE | Serine protease inhibitor A3K (SerpA3K)                                    | 0.54                | --                  | --                  | --                  |
| 13 | Q3UV17 | K22O_MOUSE  | Keratin, type II cytoskeletal 2 oral (K76)                                 | --                  | --                  | 0.52                | --                  |
| 14 | Q8VCM7 | FIBG_MOUSE  | Fibrinogen gamma chain                                                     | --                  | --                  | --                  | 0.52                |
| 15 | Q3TTY5 | K22E_MOUSE  | Keratin, type II cytoskeletal 2 epidermal (CK-2e) (K2e)                    | --                  | --                  | 0.54                | --                  |
| 16 | O88342 | WDR1_MOUSE  | WD repeat-containing protein 1 (AIP1)                                      | --                  | --                  | --                  | 0.54                |
| 17 | Q06194 | FA8_MOUSE   | Coagulation factor VIII                                                    | Only ID             |                     |                     |                     |
| 18 | P32037 | GTR3_MOUSE  | Solute carrier family 2, facilitated glucose transporter member 3 (GLUT-3) | Only ID             |                     |                     |                     |
| 19 | Q61207 | SAP_MOUSE   | Sulfated glycoprotein 1 (SGP-1)                                            | Only ID             |                     |                     |                     |
| 20 | O88947 | FA10_MOUSE  | Activated factor Xa heavy chain                                            | Only ID             |                     |                     |                     |
| 21 | Q6IRU2 | TPM4_MOUSE  | Tropomyosin alpha-4 chain                                                  | Only ID             |                     |                     |                     |
| 22 | P49182 | HEP2_MOUSE  | Heparin cofactor 2 (HC-II)                                                 | Only ID             |                     |                     |                     |
| 23 | P47738 | ALDH2_MOUSE | Aldehyde dehydrogenase, mitochondrial                                      | Only ID             |                     |                     |                     |
| 24 | P70274 | SEPP1_MOUSE | Selenoprotein P (SeP)                                                      | Only ID             |                     |                     |                     |
| 25 | Q91V41 | RAB14_MOUSE | Ras-related protein Rab-14                                                 | Only ID             |                     |                     |                     |
| 26 | Q8K113 | SPP24_MOUSE | Secreted phosphoprotein 24 (Spp-24)                                        | Only ID             |                     |                     |                     |
| 27 | P46638 | RB11B_MOUSE | Ras-related protein Rab-11B                                                | Only ID             |                     |                     |                     |
| 28 | P39876 | TIMP3_MOUSE | Metalloproteinase inhibitor 3 (TIMP-3)                                     | Only ID             |                     |                     |                     |
| 29 | Q08879 | FBLN1_MOUSE | Fibulin-1 (FIBL-1) (BM-90)                                                 | Only ID             |                     |                     |                     |

Supplementary information

| #  | AC                | ID          | Description                                                                | Ratio   |
|----|-------------------|-------------|----------------------------------------------------------------------------|---------|
| 30 | Q8K0D2_ISOFORM_2  | HABP2_MOUSE | Hyaluronan-binding protein 2 27 kDa light chain alternate form [ISOFORM 2] | Only ID |
| 31 | P33587            | PROC_MOUSE  | Activation peptide                                                         | Only ID |
| 32 | P01663            | KV3AB_MOUSE | Ig kappa chain V-III region PC 4050                                        | Only ID |
| 33 | Q62009_ISOFORM_5  | POSTN_MOUSE | Periostin (PN) (OSF-2) [ISOFORM 5]                                         | Only ID |
| 34 | P68373            | TBA1C_MOUSE | Tubulin alpha-1C chain                                                     | Only ID |
| 35 | P63001            | RAC1_MOUSE  | Ras-related C3 botulinum toxin substrate 1                                 | Only ID |
| 36 | P52480_ISOFORM_M1 | KPYM_MOUSE  | Pyruvate kinase PKM [ISOFORM M1]                                           | Only ID |
| 37 | A2AQ07            | TBB1_MOUSE  | Tubulin beta-1 chain                                                       | Only ID |
| 38 | P35441            | TSP1_MOUSE  | Thrombospondin-1                                                           | Only ID |
| 39 | Q8CFG8            | CS1B_MOUSE  | Complement C1s-B subcomponent light chain                                  | Only ID |
| 40 | P45700            | MA1A1_MOUSE | Mannosyl-oligosaccharide 1,2-alpha-mannosidase IA                          | Only ID |
| 41 | P97873            | LOXL1_MOUSE | Lysyl oxidase homolog 1 [CHAIN 0]                                          | Only ID |
| 42 | O55042_ISOFORM_2  | SYUA_MOUSE  | Alpha-synuclein (NACP) [ISOFORM 2]                                         | Only ID |
| 43 | P13020            | GELS_MOUSE  | Gelsolin (ADF)                                                             | Only ID |

Supplementary information

**Figure S2. Network and upstream analysis of NI-associated proteins.** **A, B)** Most relevant networks showing the connectivity between proteins experimentally identified as significantly decreased in ECM and/or d3 pi compared to NI samples or only identified in NI mouse sample. The most important biological functions, associated to each network, are reported at the bottom of the network. Yellow: proteins identified as significantly over-expressed in NI; Blue: proteins uniquely identified in the NI sample; Orange: complex molecules for which one or more protein chains/protein components have been identified. **C)** Top-5 molecules significantly likely to regulate the proteins experimentally found to be NI-associated. For each regulator the list of target proteins in the experimental dataset is given. *P-value*: Fisher's exact test, indication of the overlap between the proteins in the dataset and the genes known to be affected by the regulator.

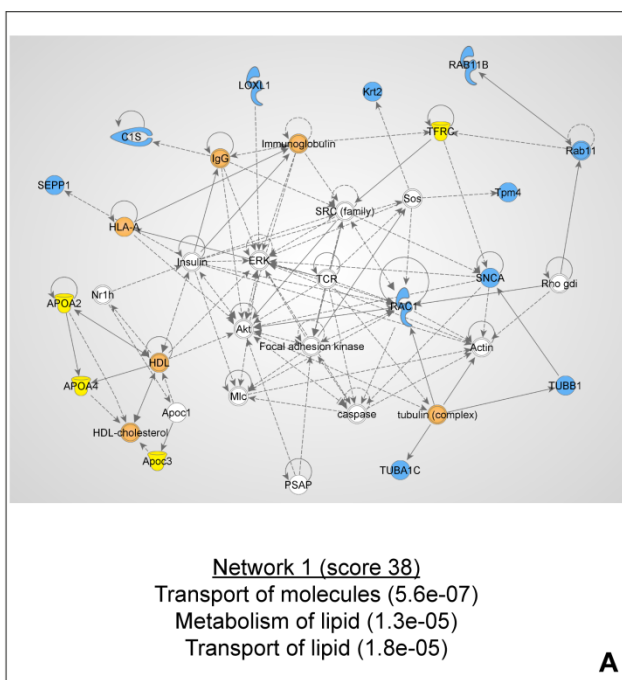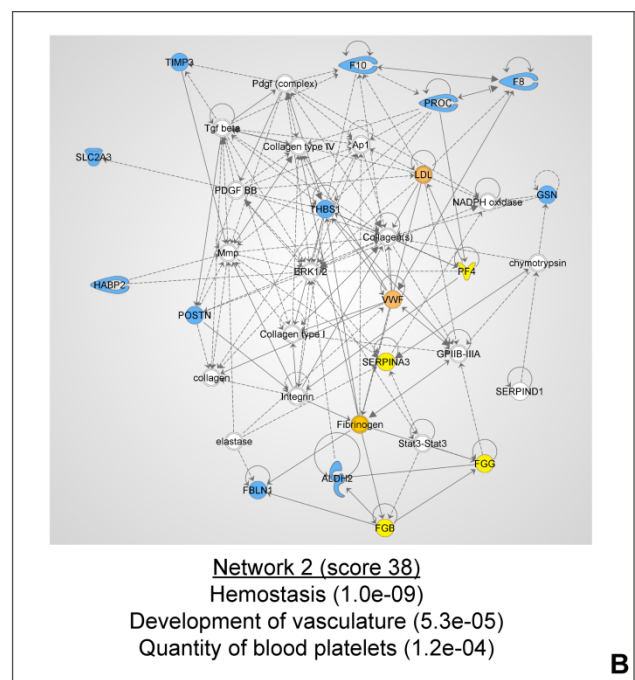

**Top-5 up-stream regulators**

| Regulator   | Type of molecule | p-value | Target molecules in dataset                                                          |
|-------------|------------------|---------|--------------------------------------------------------------------------------------|
| VIPAS39     | Other            | 1.0E-07 | PF4, THBS1, VWF                                                                      |
| NBEAL2      | Other            | 1.5E-06 | PF4, THBS1, VWF                                                                      |
| TGFB1       | Growth factor    | 2.8E-06 | ALDH2, C1S, GSN, LOXL1, POSTN, RAC1, SERPINA3, SLC2A3, TFRC, THBS1, TIMP3, Tpm4, VWF |
| PPARA       | Ligand-dependent | 7.5E-06 | ALDH2, APOA2, APOA4, Apoc3, C1S, FGB, FGG                                            |
| Stat3-Stat3 | Complex          | 1.0E-05 | FGB, FGG, SERPINA3                                                                   |

**C**

Supplementary information

**Figure S3. Detection of  $\gamma$ -actin in MP from DBA/1 mice.** The abundance of  $\gamma$ -actin in MP from NI and ECM DBA/1 mice assessed for CA-I and S100A8 was measured by western blot. As shown, actin abundance in the different samples is highly variable and cannot be considered as a loading control. Nonetheless, the overabundance of CA-I in ECM MP is confirmed even after actin normalisation, as well as the absence of S100A8 in NI samples.

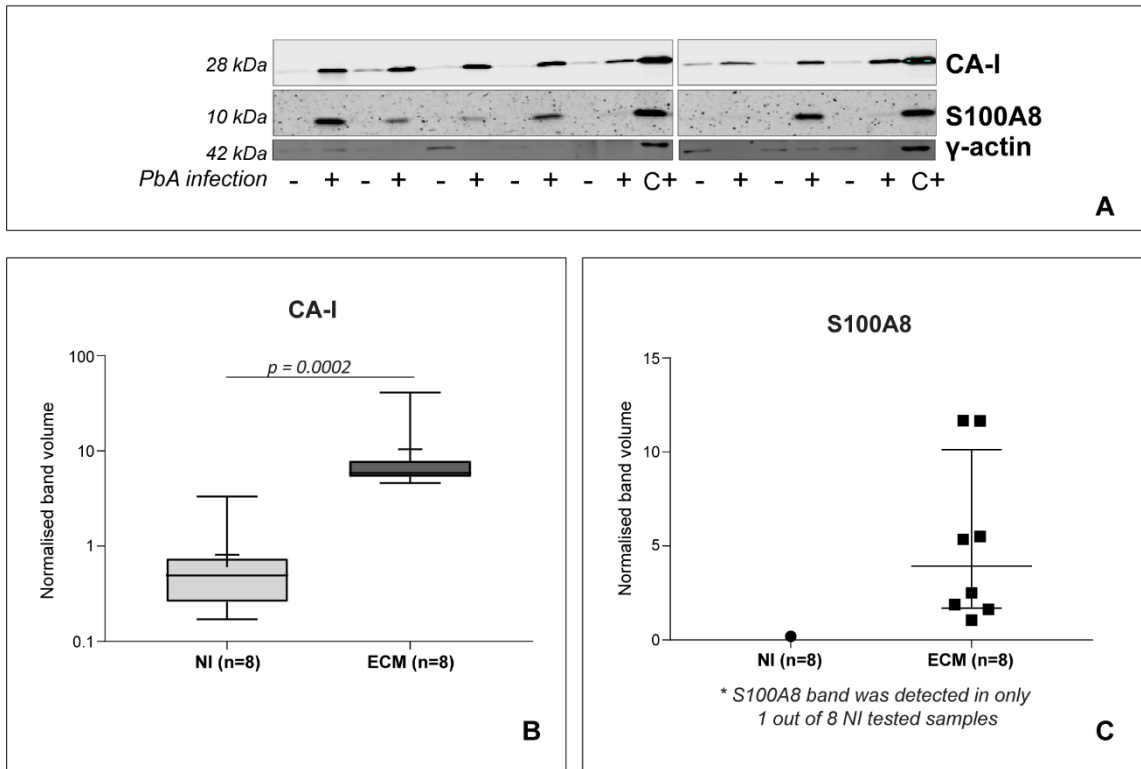

Supplementary information

**Figure S4. CA-I and S100A8 expression in DBA/1 PFP and MFP.** The expression level of CA-I and S100A8 in DBA/1 mice platelet free plasma (PFP) and microparticle free plasma (MFP) was assessed by western blot in n=5 NI mice (-) and n=5 PbA-infected ECM mice (+). C+=positive control, murine spleen.

The quantification of CA-I band volume is reported in the boxplot, where “+” represents the group mean. PFP and MFP groups were compared with the Wilcoxon matched-pairs signed rank test, while ECM and NI samples were compared with the Mann-Whitney *U* test. All comparisons were non-significant. Due to the lack of signal in the majority of the samples, no quantification was done for S100A8.

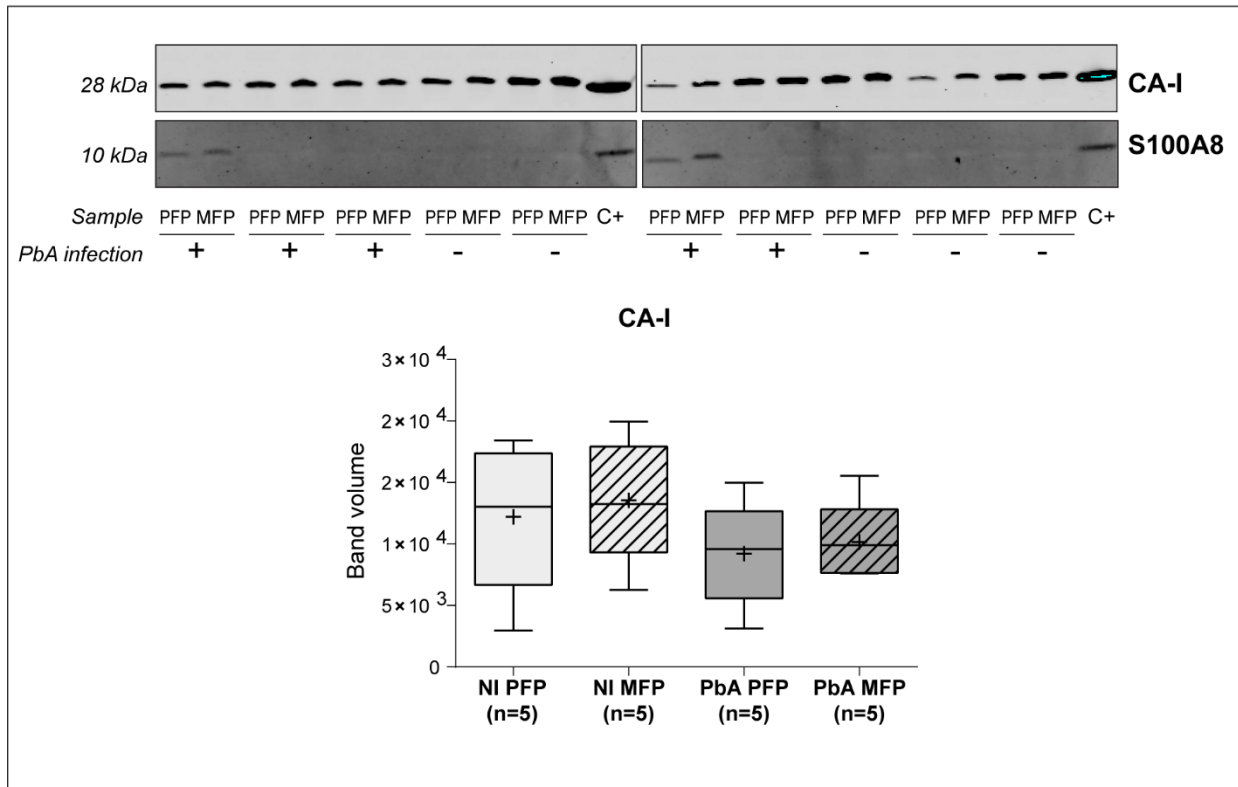



Supplementary information

**Figure S5. CA-I and S100A8 expression in C57BL/6 mice MP and PFP.** The expression level of S100A8 and CA-I in C57BL/6 mice MP and platelet free plasma (PFP) was assessed by western blot in n=4 NI mice and n=4 PbA-infected ECM mice. C+=positive control, murine spleen.

**A)** Western blot results obtained on MP samples and **B)** the corresponding quantification; for S100A8 no signal was detected in NI samples. **C)** Western blot results obtained on PFP samples and **D)** the corresponding signal quantification for CA-I. Since no signal was detected for S100A8, no quantification was done. Statistical comparisons were done with the t-test.

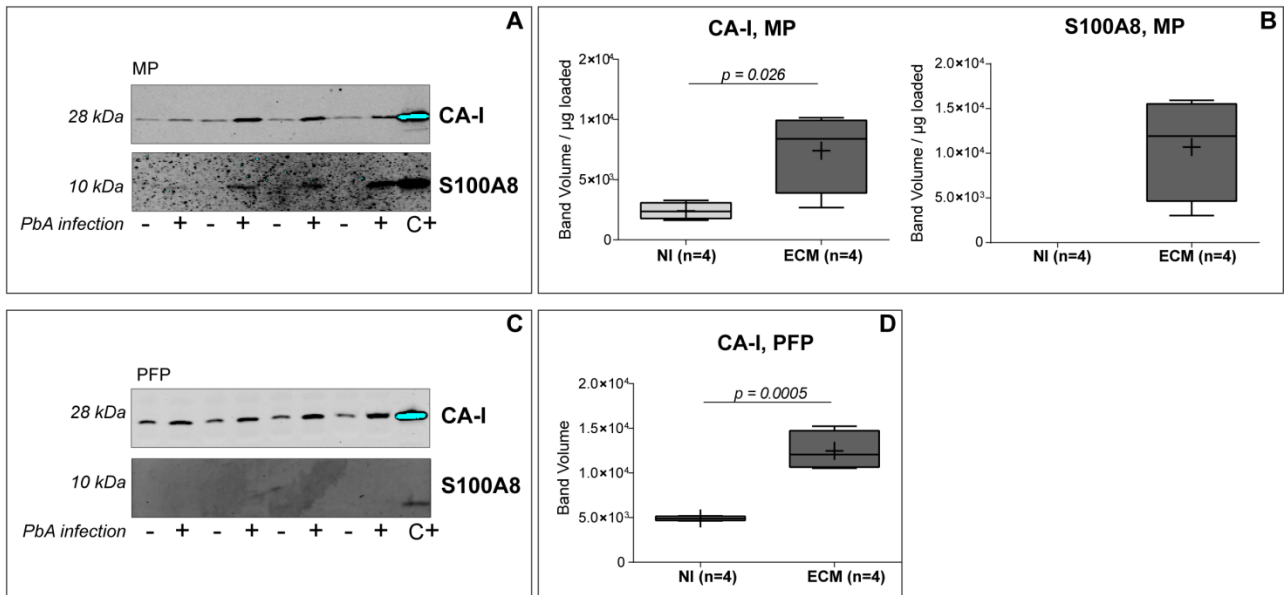

Supplementary information

**Figure S6. CA-I and S100A8 abundance in MP from clinical samples.** CA-I and S100A8 abundance was also assessed on MP samples from a small number of clinical samples. Community healthy controls (CC), asymptomatic malaria patients (AM) and cerebral malaria patients (CM) were included. In order to have a sufficient amount of proteins for CC, a pool of two samples was prepared for each CC lane. **A)** Demographic description of the patients investigated by western blot. **B)** Example of western blot results obtained on human MP. **C)** Quantification results. No statistical difference was detected for CA-I abundance between the 3 groups (Kruskal-Wallis test), however a 1.9 increased abundance was observed in CM compared to AM (mean CM/mean AM). The abundance of S100A8 was significantly higher in MP from CM patients compared to both CC and AM (One-way ANOVA followed by Dunnet's multiple comparison).

|                                    | CC (n=14)* | AM (n=8)**               | CM (n=7)                     | p-value | Test                    |
|------------------------------------|------------|--------------------------|------------------------------|---------|-------------------------|
| <b>Gender, F (n)</b>               | 8          | 4                        | 3                            | ns      | Chi-square              |
| <b>Age, years (Mean ± SD)</b>      | 4.2 ± 0.95 | 3.5 ± 1.87               | 3.3 ± 0.95                   | ns      | Kruskal-Wallis          |
| <b>Parasites/μl (Mean [range])</b> | 0          | 8152.5<br>[1200 - 42840] | 262482.9<br>[17080 - 609400] | 0.0012  | Mann-Whitney (AM vs CM) |

\* Seven pools of 2 patients each were obtained

\*\* Two samples were pooled, the remaining 6 were analysed individually

CC: community control, AM: asymptomatic malaria; CM: cerebral malaria

**A**

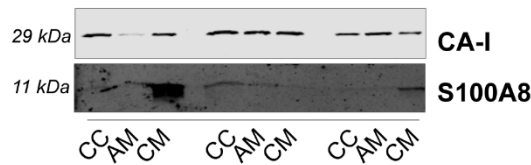

**B**

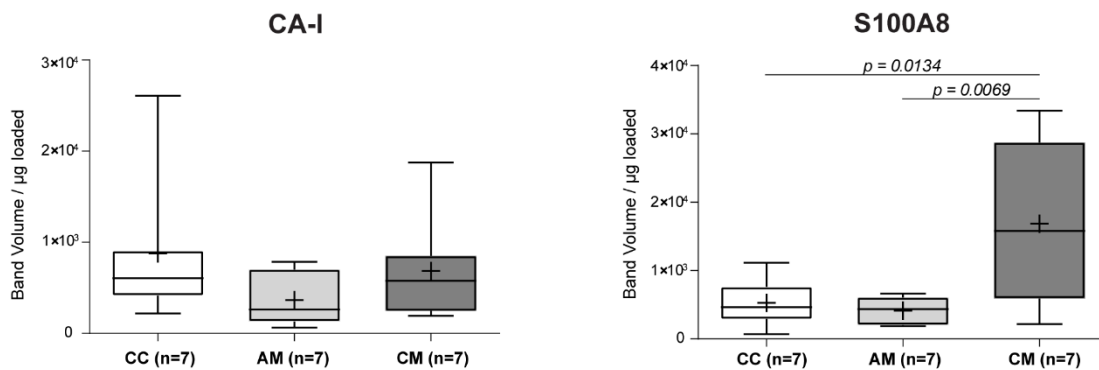

**C**
